# Supplementary material for: Highly efficient In2S3/WO3 photocatalysts: Z-scheme photocatalytic mechanism for enhanced photocatalytic water pollutant degradation under visible light irradiation
Source: Royal Society of Chemistry journal article supplement (doi:10.1039/d0ra09315g), 2021-01-01
Supplement: d0ra09315g1.pdf [file d0ra09315g1.pdf]

**Highly Efficient In<sub>2</sub>S<sub>3</sub>/WO<sub>3</sub> Photocatalysts: Z-Scheme Photocatalytic  
Mechanism for Their Enhanced Photocatalytic Water Pollutants  
Degradation under Visible Light Irradiation**

Qingqing Qiu<sup>a</sup>, Peng Zhu<sup>a</sup>, Yao Liu<sup>b</sup>, Tongxiang Liang<sup>\*a</sup>, Tengfeng Xie<sup>\*c</sup>, Yanhong  
Lin<sup>c</sup>

<sup>a</sup>Engineering Research Center for Hydrogen Energy Materials and Devices, College  
of Rare Earths, Jiangxi University of Science and Technology, 86 Hong Qi Road,  
Ganzhou 341000, PR China

<sup>b</sup>Faculty of Materials Metallurgy and Chemistry, Jiangxi University of Science and  
Technology, 86 Hong Qi Road, Ganzhou 341000, PR China

<sup>c</sup>College of Chemistry, Jilin University, Changchun 130012, P. R. China

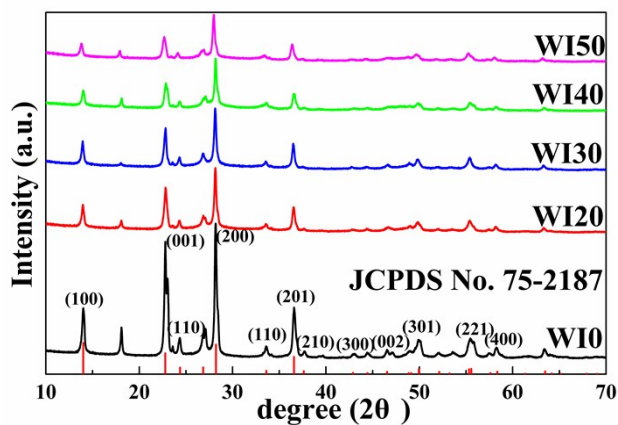

Figure. S1 XRD patterns of WI10, WI20, WI30, WI40 and WI50.

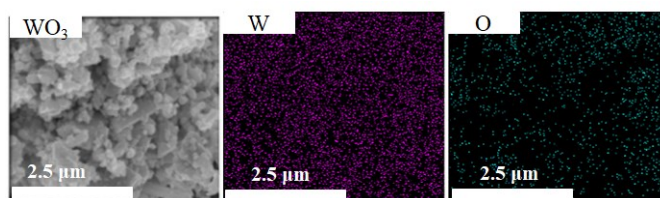

Figure. S2 The EDX mappings of  $\text{WO}_3$ .

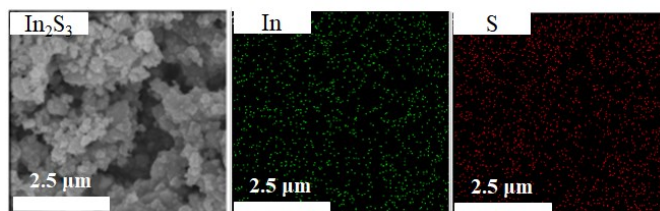

Figure. S3 The EDX mappings of  $\text{In}_2\text{S}_3$ .

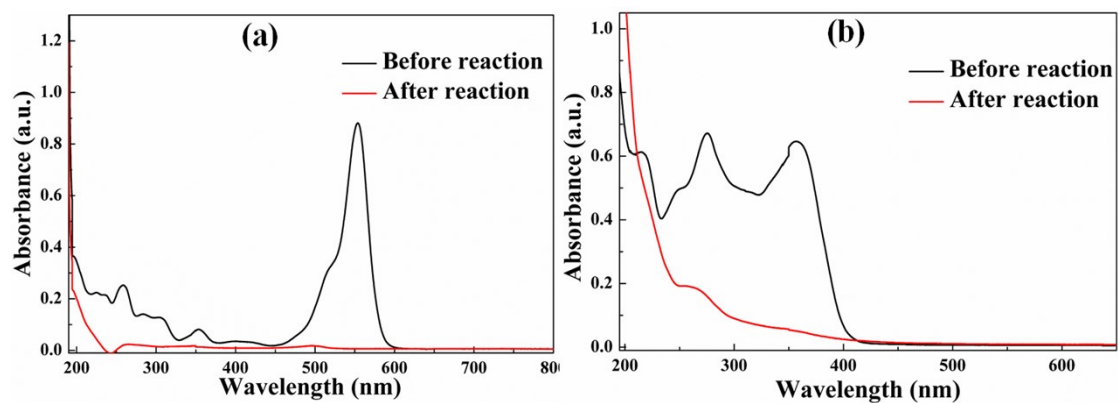

Figure S4. (a) UV-visible absorption spectra of Rh B solutions before and after photocatalytic degradation reaction under visible light irradiation in the presence of

WI40; (b) UV-visible absorption spectra of TCH solutions before and after photocatalytic degradation reaction under visible light irradiation in the presence of WI40.

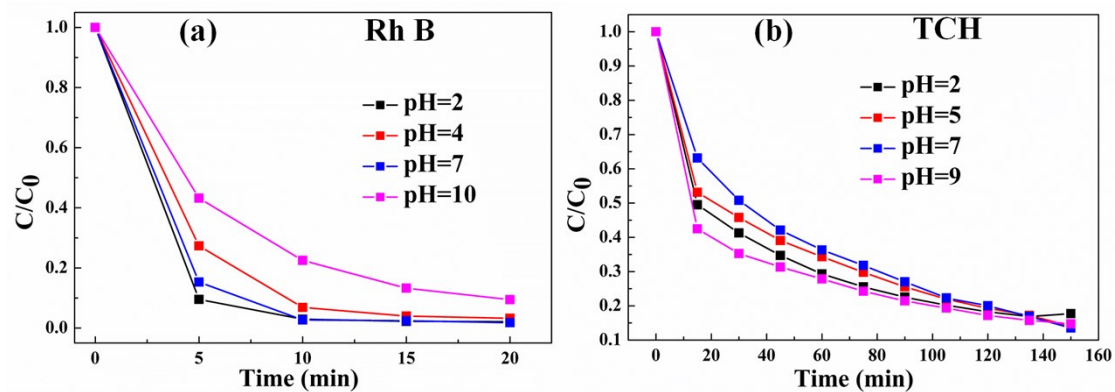

Figure S5. The solution pH for (a) Rh B and (b) TCH degradation by WI40 under visible light irradiation.

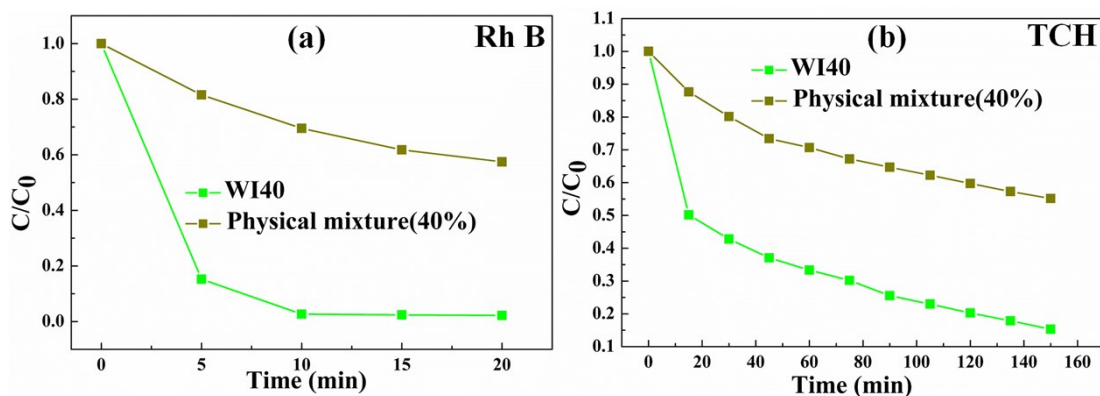

Figure S6. Photocatalytic degradation performance of (a) WI40 and (b) the physical mixture of  $\text{In}_2\text{S}_3(40 \text{ wt } \%) / \text{WO}_3$  for Rh B and TCH under visible light irradiation.

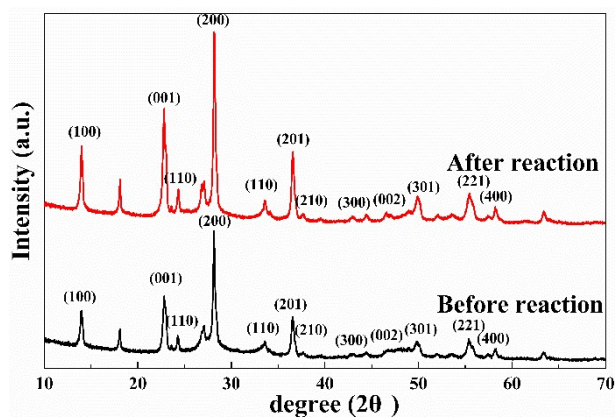

Figure S7. XRD patterns of WI40 before and after photocatalytic degradation reaction.
